# Supplementary material for: Study on the crystallization behavior and conformation adjustment scale of poly(lactic acid) in the terahertz frequency range
Source: Royal Society of Chemistry journal article supplement (doi:10.1039/d3cp00208j), 2023-01-01
Supplement: d3cp00208j1.pdf [file d3cp00208j1.pdf]

# Study on the crystallization behavior and conformation adjustment scale of poly (lactic acid) in the terahertz frequency range

Zhenqi Zhu<sup>a</sup>, Zelin Yu<sup>c</sup>, Yujing Bian<sup>a</sup>, Xun Zhang<sup>a</sup>, Ruonan Zeng<sup>a</sup> and Bin Yang<sup>a, b, \*</sup>

<sup>a</sup> College of Textile Science and Engineering (International Institute of Silk), Zhejiang Sci-Tech University, Hangzhou, 310018, PR China

<sup>b</sup> Key Laboratory of Advanced Textile Materials and Manufacturing Technology, Ministry of Education, Zhejiang Sci-Tech University, Hangzhou, 310018, PR China

<sup>c</sup> First Clinical Medical College, Zhejiang Chinese Medical University, Hangzhou, 310018, PR China

\*E-mail: [yangbin5959@zstu.edu.cn](mailto:yangbin5959@zstu.edu.cn)

## EXPERIMENTAL SECTION

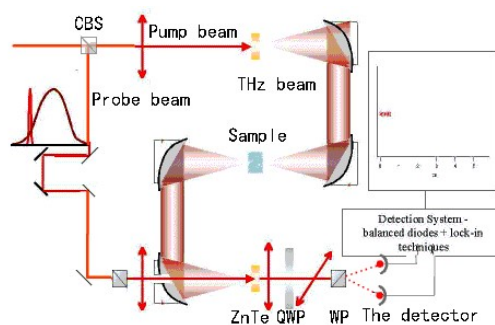

Fig. S1 Terahertz time-domain spectroscopy system: the center wavelength of laser was 800 nm, repetition frequency was 84 MHz, and pulse width was 100 fs. The spectral resolution was less than 5 GHz.

Table S1

Diffraction peak angle of the PLA films crystallized at different temperatures.

| Crystallization temperature, $T_c$ | (103) | (010) | (110/200<br>) | (203) | (210) |
|------------------------------------|-------|-------|---------------|-------|-------|
| 40                                 | -     | -     | 16.61         | 18.95 | -     |
| 50                                 | -     | -     | 16.61         | 18.95 | -     |
| 55                                 | -     | -     | 16.61         | 18.95 | -     |
| 60                                 | -     | -     | 16.61         | 18.95 | -     |
| 65                                 | -     | -     | 16.61         | 18.95 | -     |
| 70                                 | -     | 14.85 | 16.62         | 18.96 | 22.39 |
| 75                                 | -     | 14.85 | 16.63         | 18.97 | 22.39 |
| 80                                 | -     | 14.85 | 16.66         | 18.99 | 22.39 |
| 90                                 | -     | 14.85 | 16.73         | 19.08 | 22.39 |
| 100                                | 12.46 | 14.89 | 16.76         | 19.12 | 22.4  |
| 105                                | 12.46 | 14.89 | 16.76         | 19.12 | 22.4  |
| 110                                | 12.46 | 14.89 | 16.76         | 19.12 | 22.4  |
| 120                                | 12.46 | 14.89 | 16.77         | 19.13 | 22.41 |
| 130                                | 12.46 | 14.89 | 16.77         | 19.13 | 22.41 |
| 140                                | 12.46 | 14.89 | 16.77         | 19.13 | 22.41 |

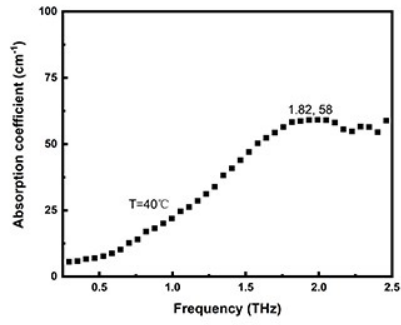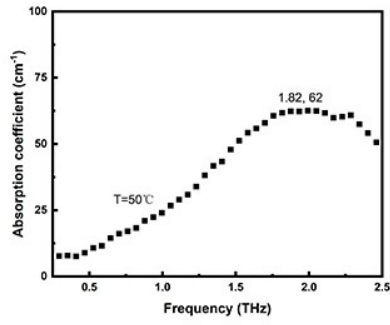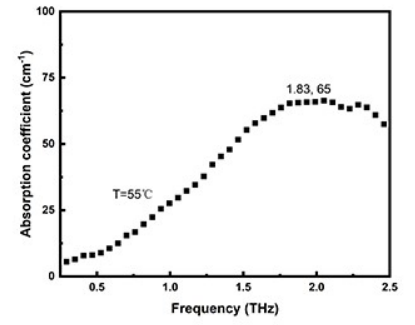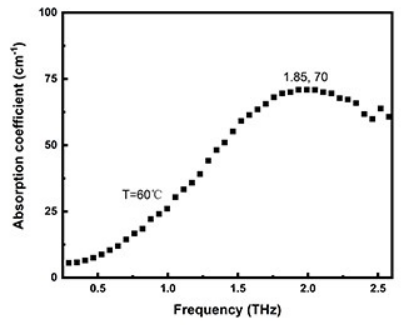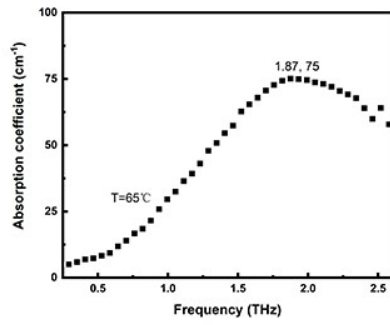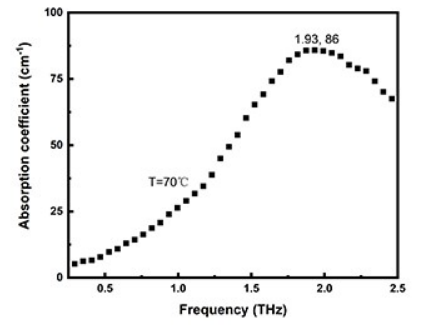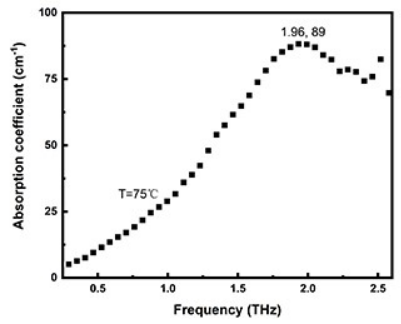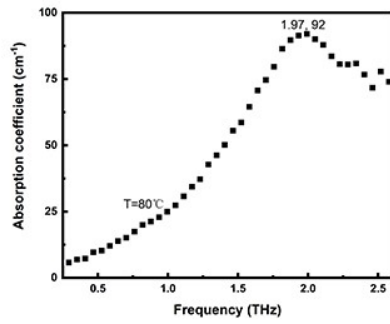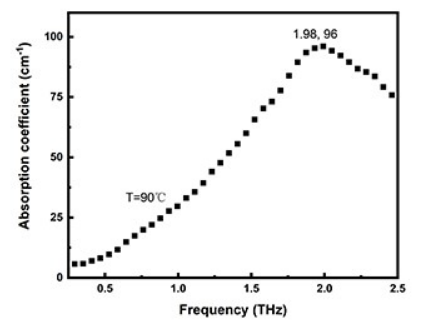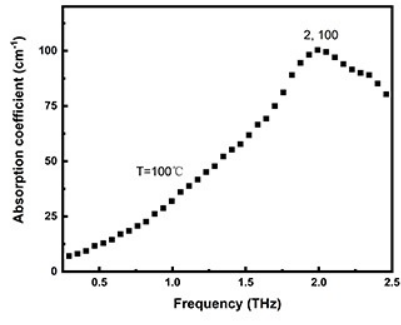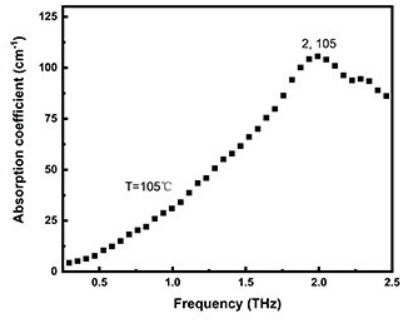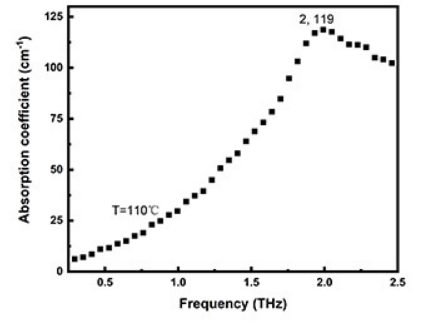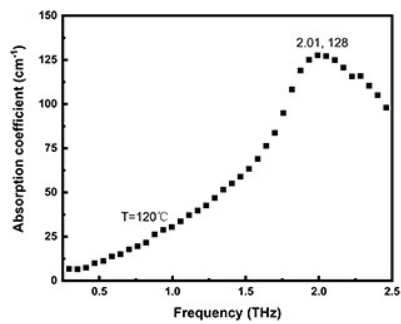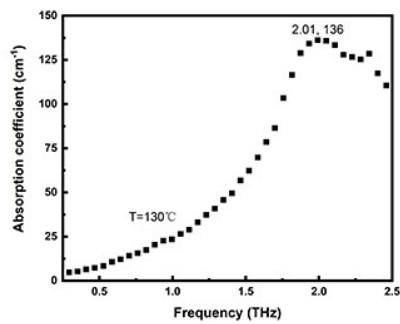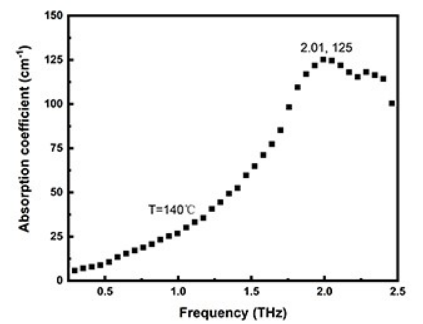

Fig. S2 THz absorption spectra of the PLA films crystallized at 40-140°C in the 0.25-2.5 THz.

Table S2

THz spectral parameters of the PLA films crystallized at different temperatures.

| Crystallization temperature, $T_c$ | Peak frequency (THz) | Absorption coefficient ( $\text{cm}^{-1}$ ) <sup>1)</sup> |
|------------------------------------|----------------------|-----------------------------------------------------------|
| 40                                 | 1.82                 | 58                                                        |
| 50                                 | 1.82                 | 62                                                        |
| 55                                 | 1.83                 | 65                                                        |
| 60                                 | 1.85                 | 70                                                        |
| 65                                 | 1.87                 | 75                                                        |
| 70                                 | 1.93                 | 86                                                        |
| 75                                 | 1.96                 | 89                                                        |
| 80                                 | 1.97                 | 92                                                        |
| 90                                 | 1.98                 | 96                                                        |
| 100                                | 2                    | 100                                                       |
| 105                                | 2                    | 105                                                       |
| 110                                | 2                    | 119                                                       |
| 120                                | 2.01                 | 128                                                       |
| 130                                | 2.01                 | 136                                                       |
| 140                                | 2.01                 | 125                                                       |

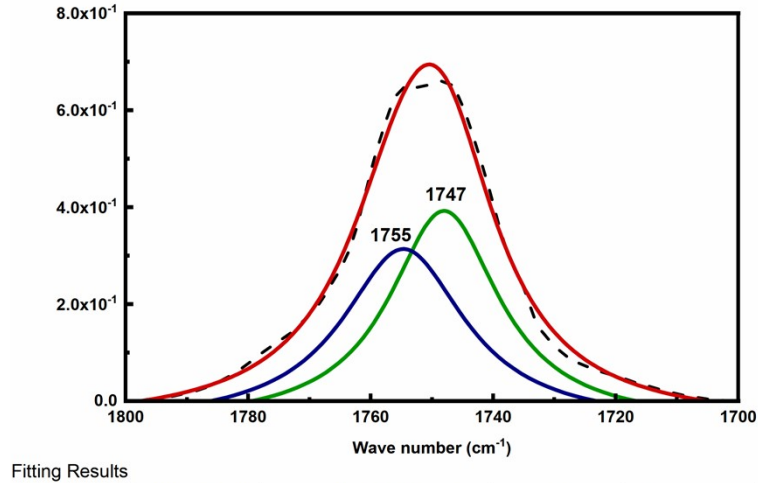

Fig. S3 Example of calculating relative conformational content of PLA film samples by FTIR spectra (1800-1700  $\text{cm}^{-1}$ ). Black dashed line represents experimental data. The solid red line represents the fitted curve. The blue solid line represents the fitted peak at  $1755\text{cm}^{-1}$ . The green solid line represents the fitted peak at  $1747\text{cm}^{-1}$ . All fitting results  $R^2 > 0.99$ .

$$X_{\text{conformation}} = \frac{A_i}{\sum A_i} \times 100$$

where  $i = 1747$  or  $1755$ .  $A_{1747}$  and  $A_{1755}$  is the integrated intensity of the bands at 1747, 1755, respectively. Brant et al. established a rotational isomeric state (RIS) model of PLA and the corresponding conformational energy map. The four lowest-energy states of PLA predicted by the RIS model correspond to four typical conformations:  $tt$  (trans, [t]),  $gt$  (gauche, [g]),  $gg$ , and  $tg$ .  $gt$  conformation has the lowest energy, corresponding to  $3_1$  or  $10_3$  helix.  $gg$  conformation with the second lowest energy state, showing a highly compressed  $4_1$  helix, and the other two relatively higher energy  $tt$  and  $tg$  conformations correspond to  $2_1$  and  $5_1$  helix, respectively.

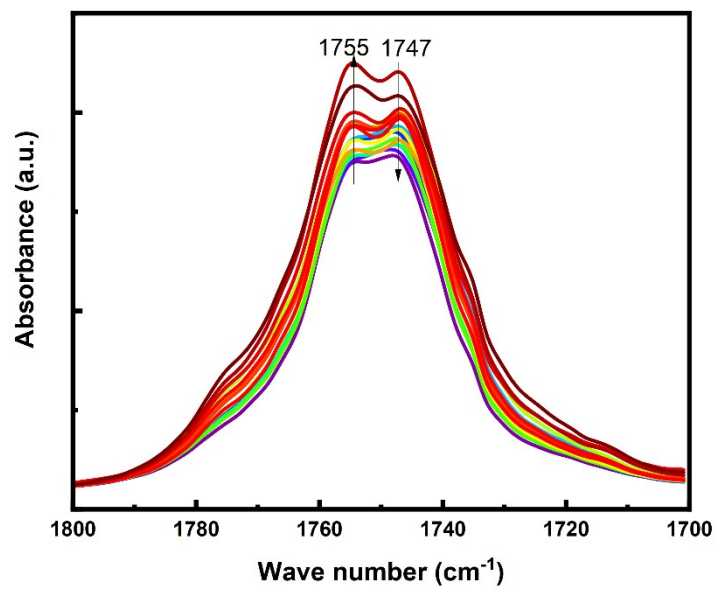

Fig. S4 FTIR of the PLA films crystallized at different temperatures in the 1800-1700  $\text{cm}^{-1}$ .

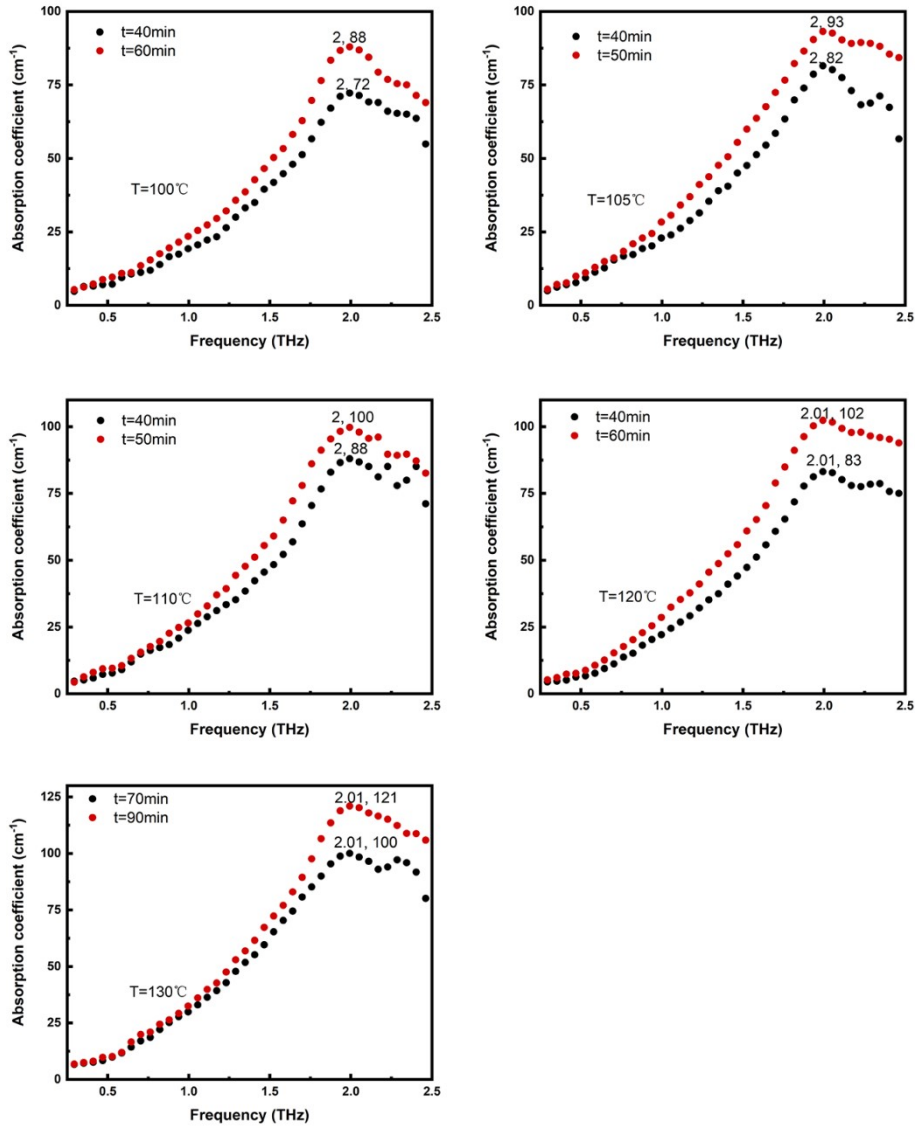

Fig. S5 Variation of absorption coefficient with time during crystallization at different heating temperatures.

Table S3

Crystallization dynamic parameters and half crystallization time of the PLA films.

| Crystallization temperature, $T_c$ | 100                   | 105                   | 110                   | 120                   | 130                  |
|------------------------------------|-----------------------|-----------------------|-----------------------|-----------------------|----------------------|
| $n$                                | 3                     | 3.04                  | 2.54                  | 2.59                  | 2.78                 |
| $k/\text{min}^{-1}$                | $5.57 \times 10^{-6}$ | $9.04 \times 10^{-6}$ | $5.48 \times 10^{-5}$ | $1.85 \times 10^{-4}$ | $6.1 \times 10^{-7}$ |
| $t_{1/2}/\text{min}$               | 48.01                 | 40.5                  | 41.3                  | 51.08                 | 66.1                 |
